# Supplementary material
Source: publisher figshare collection journal article supplement (https://tandf.figshare.com/ndownloader/files/14077673)
Supplement: Supplementary file 1 [file 14077673]

[APPENDICES]


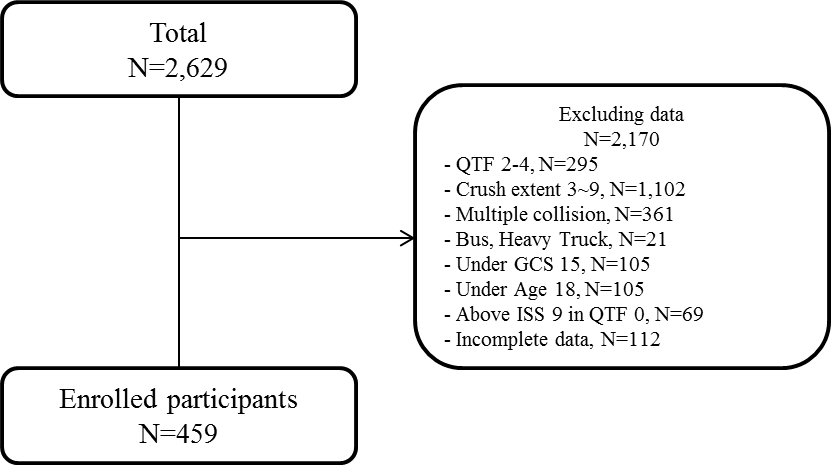


Appendix 1. Flowchart of classifying the data


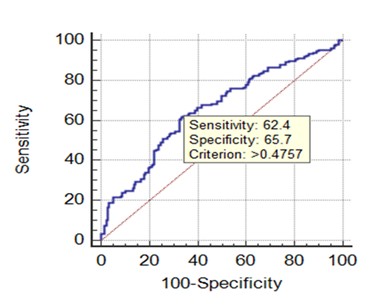


Appendix 2. ROC curve for the prediction model in Equation 2
